# Supplementary material for: An activator of mTOR inhibits oxLDL-induced autophagy and apoptosis in vascular endothelial cells and restricts atherosclerosis in apolipoprotein E-/- mice
Source: PubMed Central journal article supplement — Sci Rep. 2014 Jul 1;4:5519. doi: 10.1038/srep05519 (PMC4076681; doi:10.1038/srep05519), 2014-07-01
Supplement: srep05519-s1.pdf [file srep05519-s1.pdf]

**An activator of mTOR inhibits oxLDL -induced autophagy and apoptosis in vascular endothelial cells and restricts atherosclerosis in apolipoprotein E<sup>-/-</sup> mice**

Nan Peng<sup>1, #</sup>, Ning Meng<sup>2, 3, #</sup>, ShengQing Wang<sup>3</sup>, Fei Zhao<sup>1</sup>, Jing Zhao<sup>1</sup>, Le Su<sup>1</sup>,

ShangLi Zhang<sup>1</sup>, Yun Zhang<sup>4</sup>, BaoXiang Zhao<sup>3, \*</sup>, JunYing Miao<sup>1, 4, \*</sup>

<sup>1</sup>*Shandong Provincial Key Laboratory of Animal Cells and Developmental Biology, School of Life Science, Shandong University, Jinan 250100, China*

<sup>2</sup>*School of Biological Science and Technology, University of Jinan, Jinan 250022, China*

<sup>3</sup>*Institute of Organic Chemistry, School of Chemistry and Chemical Engineering, Shandong University, Jinan 250100, China*

<sup>4</sup>*The Key Laboratory of Cardiovascular Remodeling and Function Research, Chinese Ministry of Education and Chinese Ministry of Health, Shandong University Qilu Hospital, Jinan, 250012, China*

# Nan Peng and Ning Meng are co-first authors.

\*Correspondence to: Prof. JunYing Miao and BaoXiang Zhao, Institute of Developmental Biology, School of Life Science, Shandong University, Jinan, 250100, China.

Fax: +8653188565610; Tel.: +8653188364929. E-mail address: [miaojy@sdu.edu.cn](mailto:miaojy@sdu.edu.cn), and [bxzhao@sdu.edu.cn](mailto:bxzhao@sdu.edu.cn)

## Supplemental Information

### Supplemental Figures

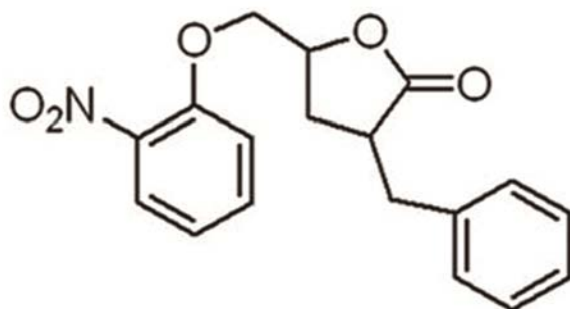

**Figure S1.** Chemical structure of 3BDO, 3-benzyl-5-((2-nitrophenoxy)methyl)-dihydrofuran-2 (3H)-one.

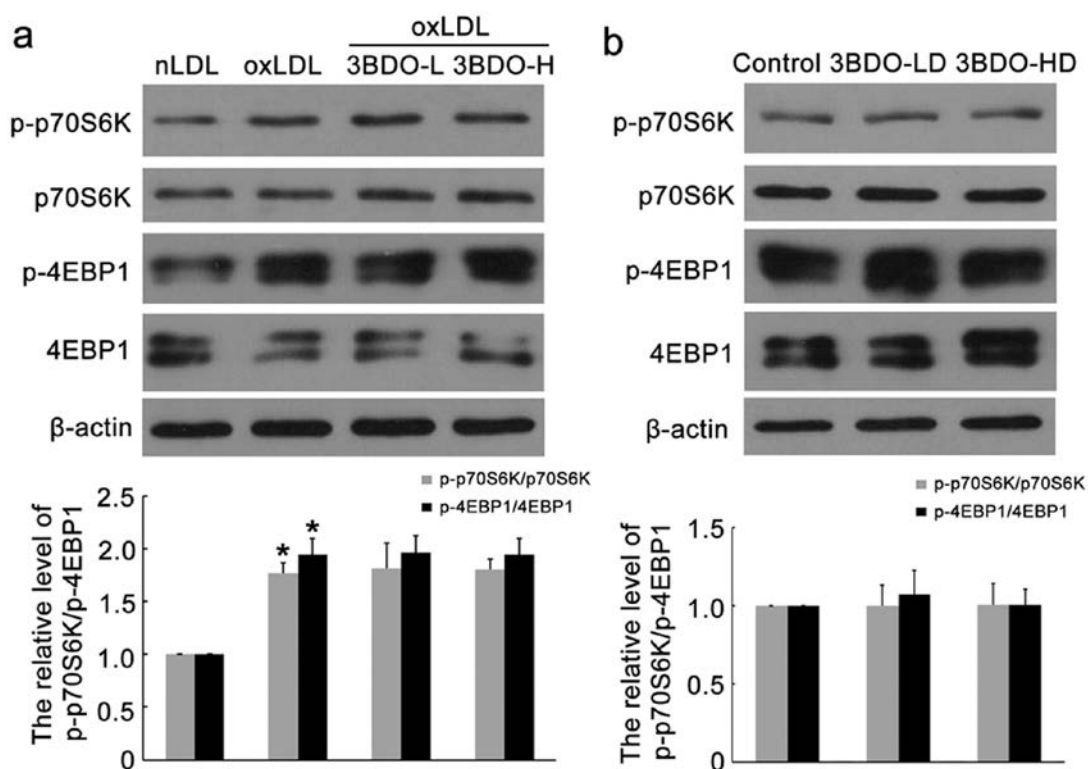

**Figure S2.** Effect of 3BDO on oxLDL-activated mTOR in macrophage cell line RAW246.7 and vascular smooth muscle cells (VSMCs) of apolipoprotein E-deficient (*apoE*<sup>-/-</sup>) mice.

**a**, Western blot analysis of p-p70S6K, p70S6K, p-4EBP1 and 4EBP1 in macrophage cell line RAW246.7. treated with nLDL, 50  $\mu$ g/ml; oxLDL, 50  $\mu$ g/ml; 3BDO-L, 60  $\mu$ M; and 3BDO-H, 120  $\mu$ M, for 12 h and densitometry results of ratio of p-p70S6K to total p70S6K and p-4EBP1 to total 4EBP1. Data are mean  $\pm$  SEM; \* $p$  < 0.05 vs. nLDL,  $n$  = 3. **b**, Western blot analysis of p-p70S6K, p70S6K, p-4EBP1 and 4EBP1 in VSMCs of apoE<sup>-/-</sup> mice and densitometry results of ratio of p-p70S6K to total p70S6K and p-4EBP1 to total 4EBP1. Data are mean  $\pm$  SEM.  $n$ =6.

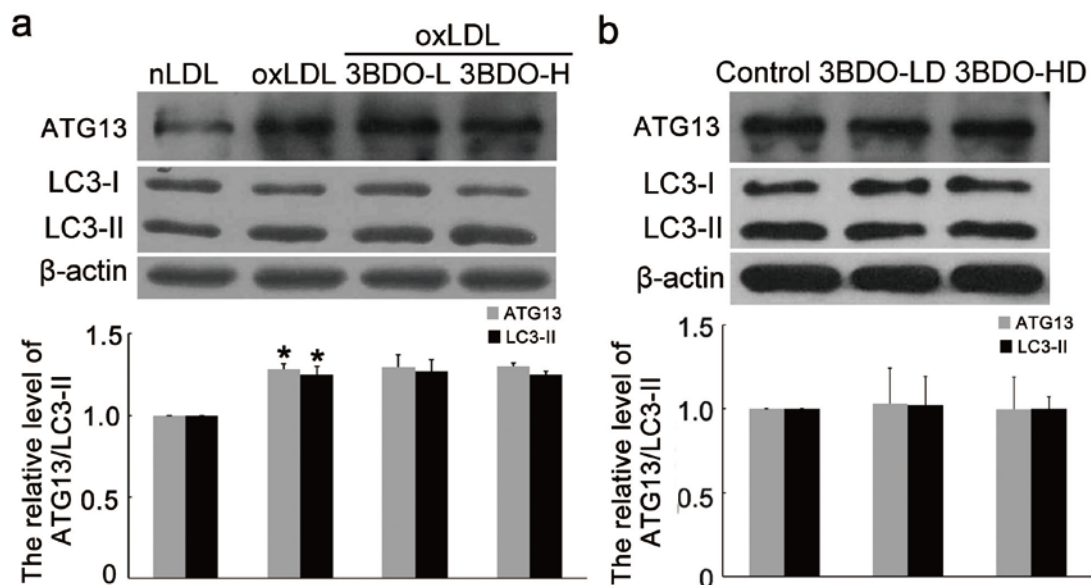

**Figure S3. Effect of 3BDO on oxLDL-induced autophagy in macrophage cell line RAW246.7 and vascular smooth muscle cells (VSMCs) of apolipoprotein E-deficient (apoE<sup>-/-</sup>) mice.**

**a**, Western blot analysis of LC3-II and ATG13 protein level in macrophage cell line RAW246.7 and quantification, with nLDL, 50  $\mu$ g/ml; oxLDL, 50  $\mu$ g/ml; 3BDO-L, 60  $\mu$ M; and 3BDO-H, 120  $\mu$ M, for 12 h. Protein levels were normalized to that of  $\beta$ -actin. Data are mean  $\pm$  SEM; \* $p$  < 0.05 vs. nLDL,  $n$  = 3. **b**, Western blot analysis of LC3-II

and ATG13 protein level in VSMCs of apoE<sup>-/-</sup> mice and quantification. Data are mean ± SEM. n=6.

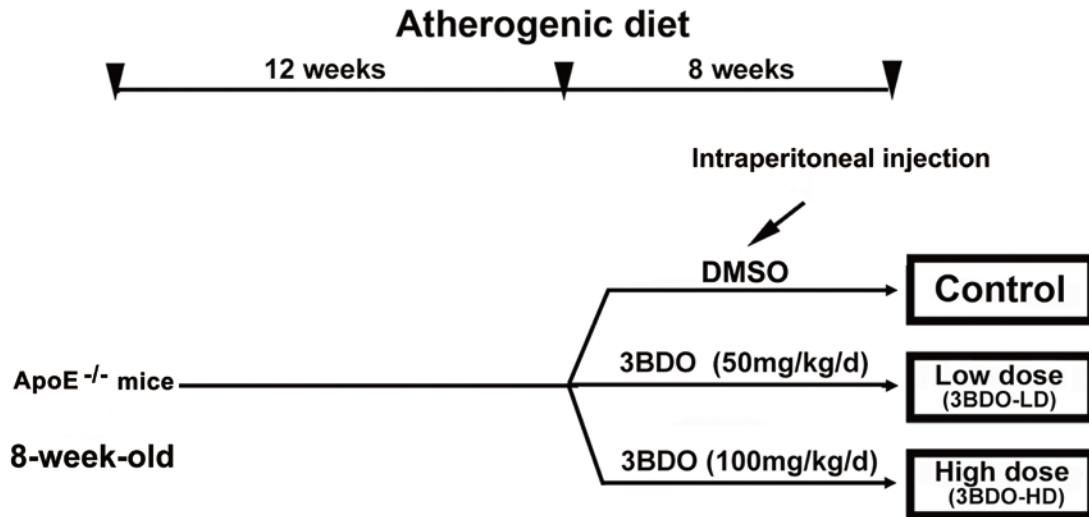

**Figure S4. The design of *in vivo* experiment.**

Eight-week-old apoE<sup>-/-</sup> mice were fed an atherogenic diet for 12 weeks and divided into 3 groups for treatment: control (DMSO), low-dose 3BDO (3BDO-LD, 50 mg/kg/d) and high-dose 3BDO (3BDO-HD, 100 mg/kg/d). N.P. drew this image by using Adobe Photoshop (Adobe, San Jose, USA).

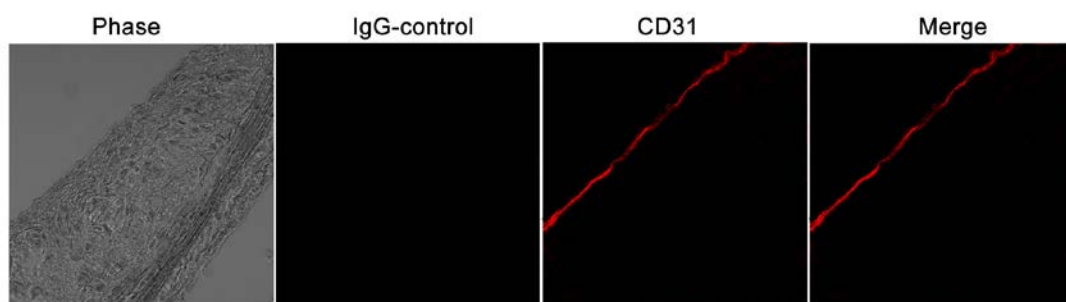

**Figure S5. The normal rabbit IgG demonstrated the specificity of the antibody anti-p-70S6K, LC3,  $\alpha$ -actin, Mac-3 and ATG13.**

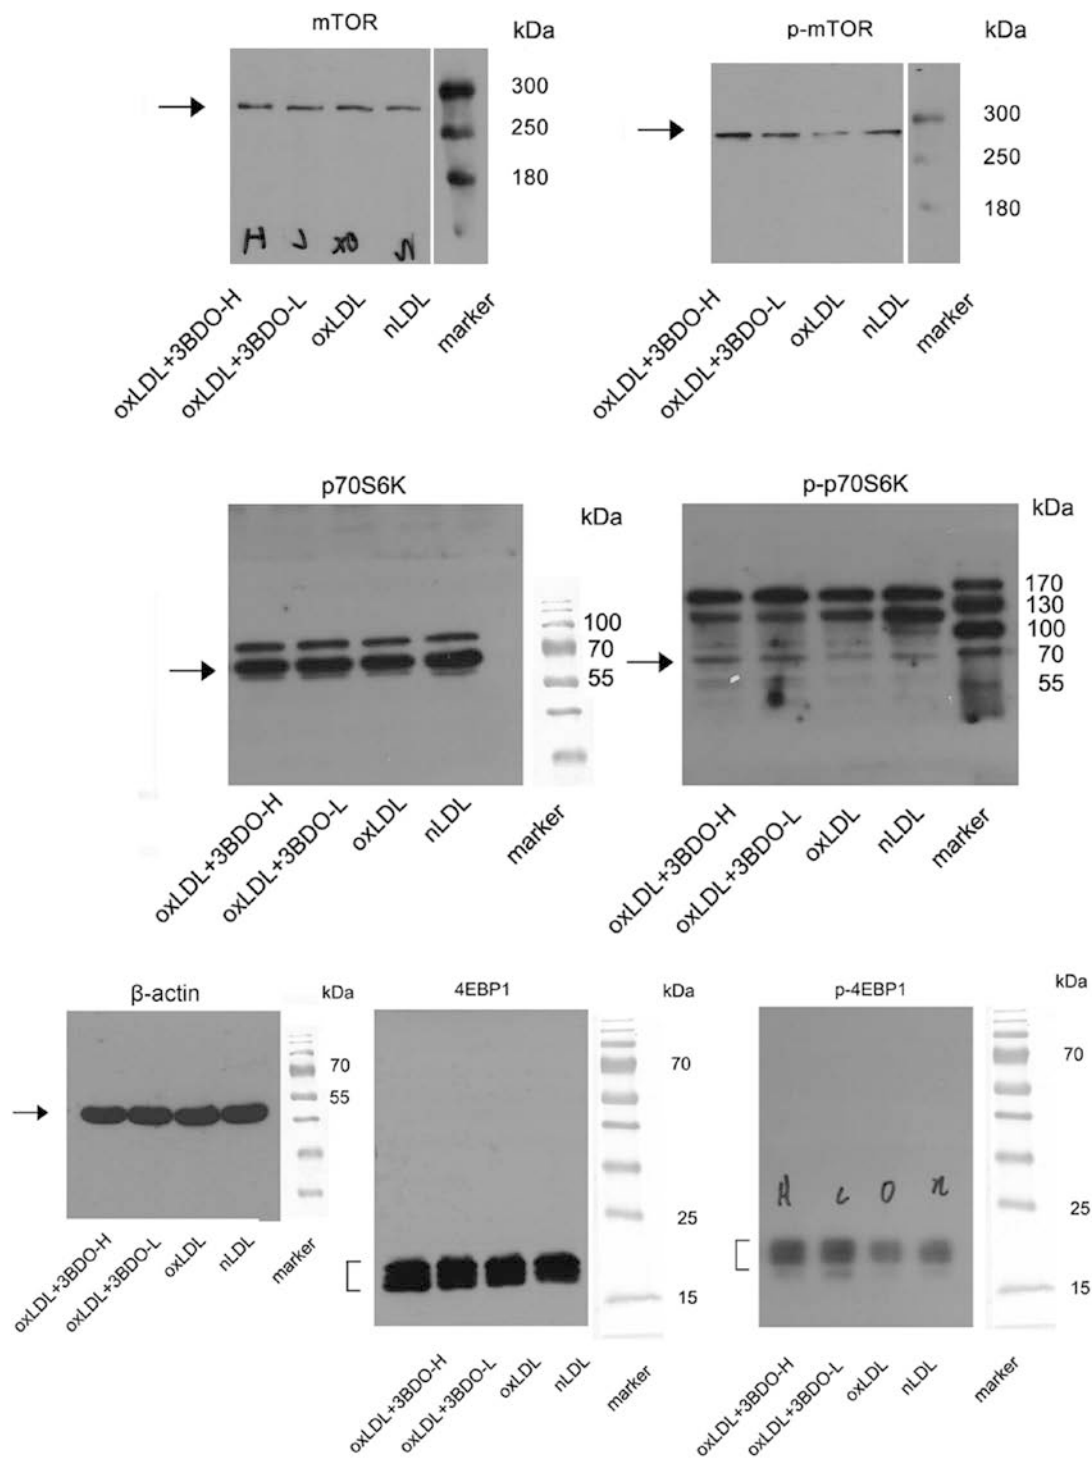

**Figure S6. Uncropped blots probed with p-mTOR, mTOR, p-p70S6K, p70S6K , p-4EBP1, 4EBP1 and  $\beta$  -actin.**

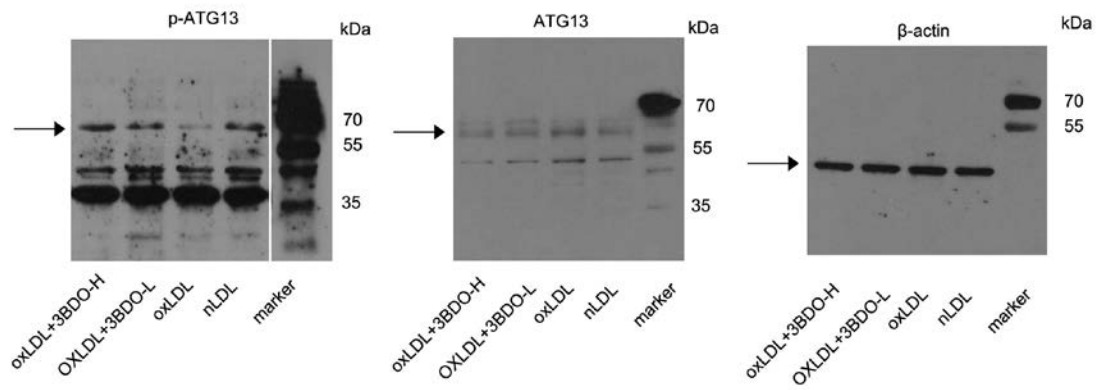

**Figure S7. Uncropped blots probed with p-ATG13, ATG13 and β -actin.**

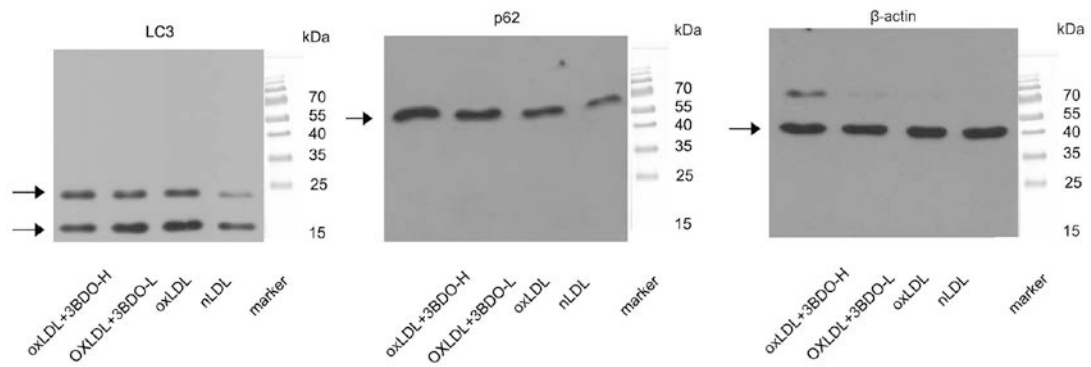

**Figure S8. Uncropped blots probed with LC3, p62 and β -actin.**

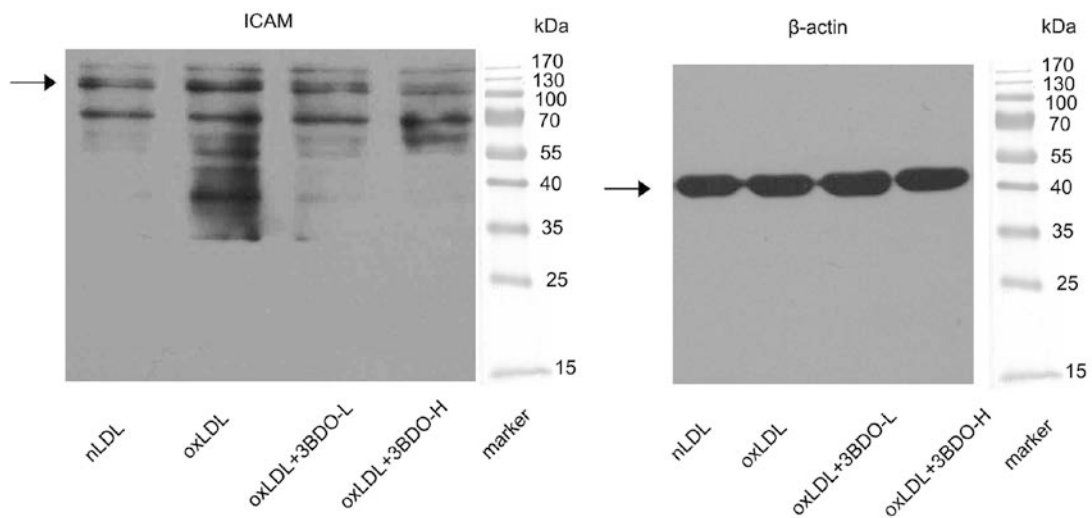

**Figure S9. Uncropped blots probed with ICAM-1 and β -actin.**

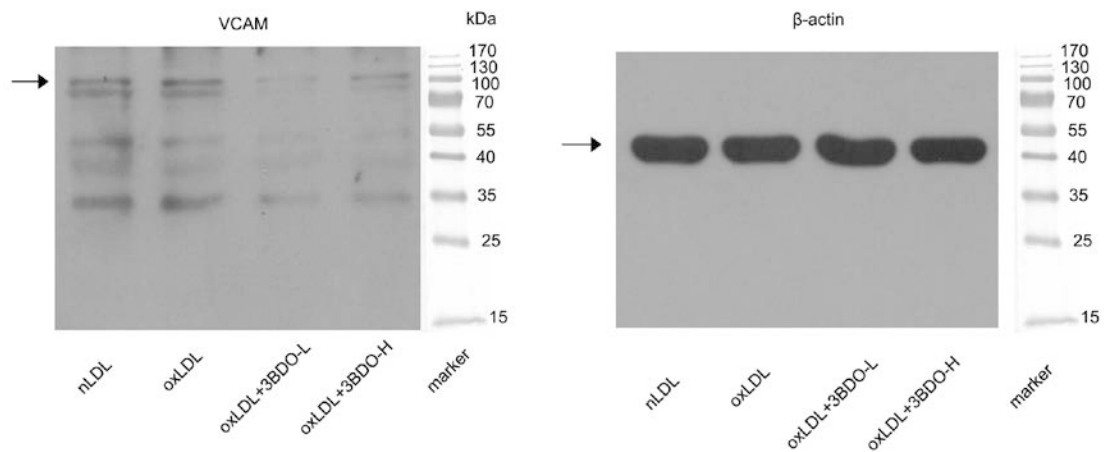

**Figure S10. Uncropped blots probed with VCAM-1 and β -actin.**

**Table S1. Measurement of organ coefficients of mice after treatment with 3BDO.**

| Groups  | Heart (%) | Liver (%) | Spleen (%) | Lung (%)  | Kidney (%) |
|---------|-----------|-----------|------------|-----------|------------|
| Control | 0.40±0.02 | 4.62±0.51 | 0.49±0.03  | 0.53±0.05 | 1.19±0.14  |
| 3BDO-LD | 0.39±0.03 | 4.59±0.53 | 0.48±0.04  | 0.52±0.06 | 1.23±0.15  |
| 3BDO-HD | 0.41±0.03 | 4.66±0.61 | 0.50±0.02  | 0.50±0.03 | 1.15±0.12  |
